# Supplementary material
Source: Springer Nature journal article supplement (https://www.springermedizin.de/resource/supplementary/13030_2010_65_MOESM1_ESM.pdf/9644704)
Supplement: MOESM1 [file 9644704]

# Stress management

Primary:  
(Preventive approach)  
To reduce job  
stressors

Secondary:  
(Ameliorative approach)  
To alter how workers  
cope with stressful  
conditions

Tertiary:  
(Reactive approach)  
To treat stressed  
workers

Working  
conditions

Mind/body  
distress

Short-term or  
temporal stress  
response

Stress-related  
illness  
conditions

Bio-psycho-social stressors
